# Supplementary material for: YPEL3 Negatively Regulates Endometrial Function via the Wnt/β-Catenin Pathways during Early Pregnancy in Goats
Source: MDPI journal article supplement (doi:10.3390/ani12212973), 2022-10-28
Supplement: s1 [file s1]

**Table S1.** Primer pairs used for Real time quantitative PCR.

| Name     | Sequence of primer (5' to 3') | Literature or gene number |
|----------|-------------------------------|---------------------------|
| YPEL3-F  | GCGGATTTCAAAGCCCAAGAC         | XM_018040973.1            |
| YPEL3-R  | GGACTTGGAGATGAGGTCGT          |                           |
| ISG15-F  | GGTGAGGAACGACAAGGGTC          | Yang et al. 2018          |
| ISG15-R  | CAGAATTGGTCCGCTTGACAC         |                           |
| RSAD-F   | TGCTTGGTGCCCGAGTCTAAC         | Yang et al. 2018          |
| RSAD-R   | TCCGCCCATTTCTACAGTTCA         |                           |
| CXCL10-F | AGGAATACACGCTGTACCTGC         | NM_001285721.1            |
| CXCL10-R | ACGTGGGCAGGATTGACTTG          |                           |
| PGFS-F   | TGGAGGACCCAGTTCTTTGTG         | Yang et al. 2018          |
| PGFS-R   | TACCTGATAGCGAAGGGCAAC         |                           |
| PTGS1-F  | TCACAGTGCGTTCCAACCTTATC       | Yang et al. 2018          |
| PTGS1-R  | ACGGAGGGCAGAATGCGAGTA         |                           |
| PTGS2-F  | GAGTGTAGGATTGACCAAGTAT        | Yang et al. 2018          |
| PTGS2-R  | CCTTGAAGTGGGTAAGTATGTAG       |                           |
| PTGES-F  | CATCAAAATGTACGCGGTGGC         | Yang et al. 2018          |
| PTGES-R  | GTCCTCGGGGTTGGCAAAAGC         |                           |
| GAPDH-F  | GATGGTGAAGGTCGGAGTGAAC        | XM_005680968.3            |
| GAPDH-R  | GTCATTGATGGCAACGATGT          |                           |

**Table S2.** Short hairpin interfering RNA (shRNA) inserts.

| shRNA     | Sequence (5' to 3')                               |
|-----------|---------------------------------------------------|
| shYPEL3-1 | GATCCGCAACCACATGATCAAAGACAATTCAAGAGATTGTCTTTGATC  |
|           | ATGTGGTTGCTTTTTTG                                 |
|           | AATTCAAAAAAGCAACCACATGATCAAAGACAATCTCTTGAATTGTCT  |
| shYPEL3-2 | TTGATCATGTGGTTGCG                                 |
|           | GATCCGTCAGGCCTACCTGGATGATTGTTCAAGAGACAATCATCCAGG  |
|           | TAGGCCTGACTTTTTTG                                 |
| shN       | AATTCAAAAAAGTCAGGCCTACCTGGATGATTGTCTCTTGAACAATCAT |
|           | CCAGGTAGGCCTGACG                                  |
|           | GATCCTTCTCCGAACGTGTCACGTTTCAAGAGAACGTGACACGTTTCGG |
| shN       | AGAATTTTTTG                                       |
|           | AATTCAAAAAATTCTCCGAACGTGTCACGTTCTCTTGAACGTGACAC   |
|           | GTTCGGAGAAG                                       |
